# Supplementary material for: Revealing the Central Mechanism of Acupuncture for Primary Dysmenorrhea Based on Neuroimaging: A Narrative Review
Source: Hindawi journal article supplement (doi:10.1155/2023/8307249), 2023-02-18
Supplement: f1 [file 8307249.f1.zip]

| Risk of bias domains                |                                     |    |    |    |    |         |   |
|-------------------------------------|-------------------------------------|----|----|----|----|---------|---|
|                                     | D1                                  | D2 | D3 | D4 | D5 | Overall |   |
| Study                               | 25(25/02/2019/1610/1607/7505/5502/2 | +  | +  | -  | +  | +       | - |
|                                     | 25(25/02/2019/1610/1607/7505/5502/2 | +  | +  | +  | +  | +       | + |
|                                     | 25(25/02/2019/1610/1607/7505/5502/2 | +  | +  | +  | +  | +       | + |
|                                     | 25(25/02/2019/1610/1607/7505/5502/2 | +  | +  | +  | +  | +       | + |
|                                     | 25(25/02/2019/1610/1607/7505/5502/2 | +  | -  | -  | +  | +       | - |
|                                     | 25(25/02/2019/1610/1607/7505/5502/2 | +  | +  | +  | +  | +       | + |
|                                     | 25(25/02/2019/1610/1607/7505/5502/2 | +  | -  | +  | +  | +       | - |
|                                     | 25(25/02/2019/1610/1607/7505/5502/2 | +  | -  | +  | +  | +       | - |
|                                     | 25(25/02/2019/1610/1607/7505/5502/2 | +  | -  | -  | +  | +       | - |
|                                     | 25(25/02/2019/1610/1607/7505/5502/2 | +  | -  | +  | +  | +       | - |
|                                     | 25(25/02/2019/1610/1607/7505/5502/2 | +  | +  | +  | +  | +       | + |
|                                     | 25(25/02/2019/1610/1607/7505/5502/2 | +  | +  | +  | +  | +       | + |
| 25(25/02/2019/1610/1607/7505/5502/2 | +                                   | +  | -  | +  | +  | -       |   |

Domains:  
D1: Bias due to randomisation.  
D2: Bias due to deviations from intended intervention.  
D3: Bias due to missing data.  
D4: Bias due to outcome measurement.  
D5: Bias due to selection of reported result.

Judgement  

X

High

-

Some concerns

+

Low

## Risk of bias assessment for inclusion in randomized controlled trials

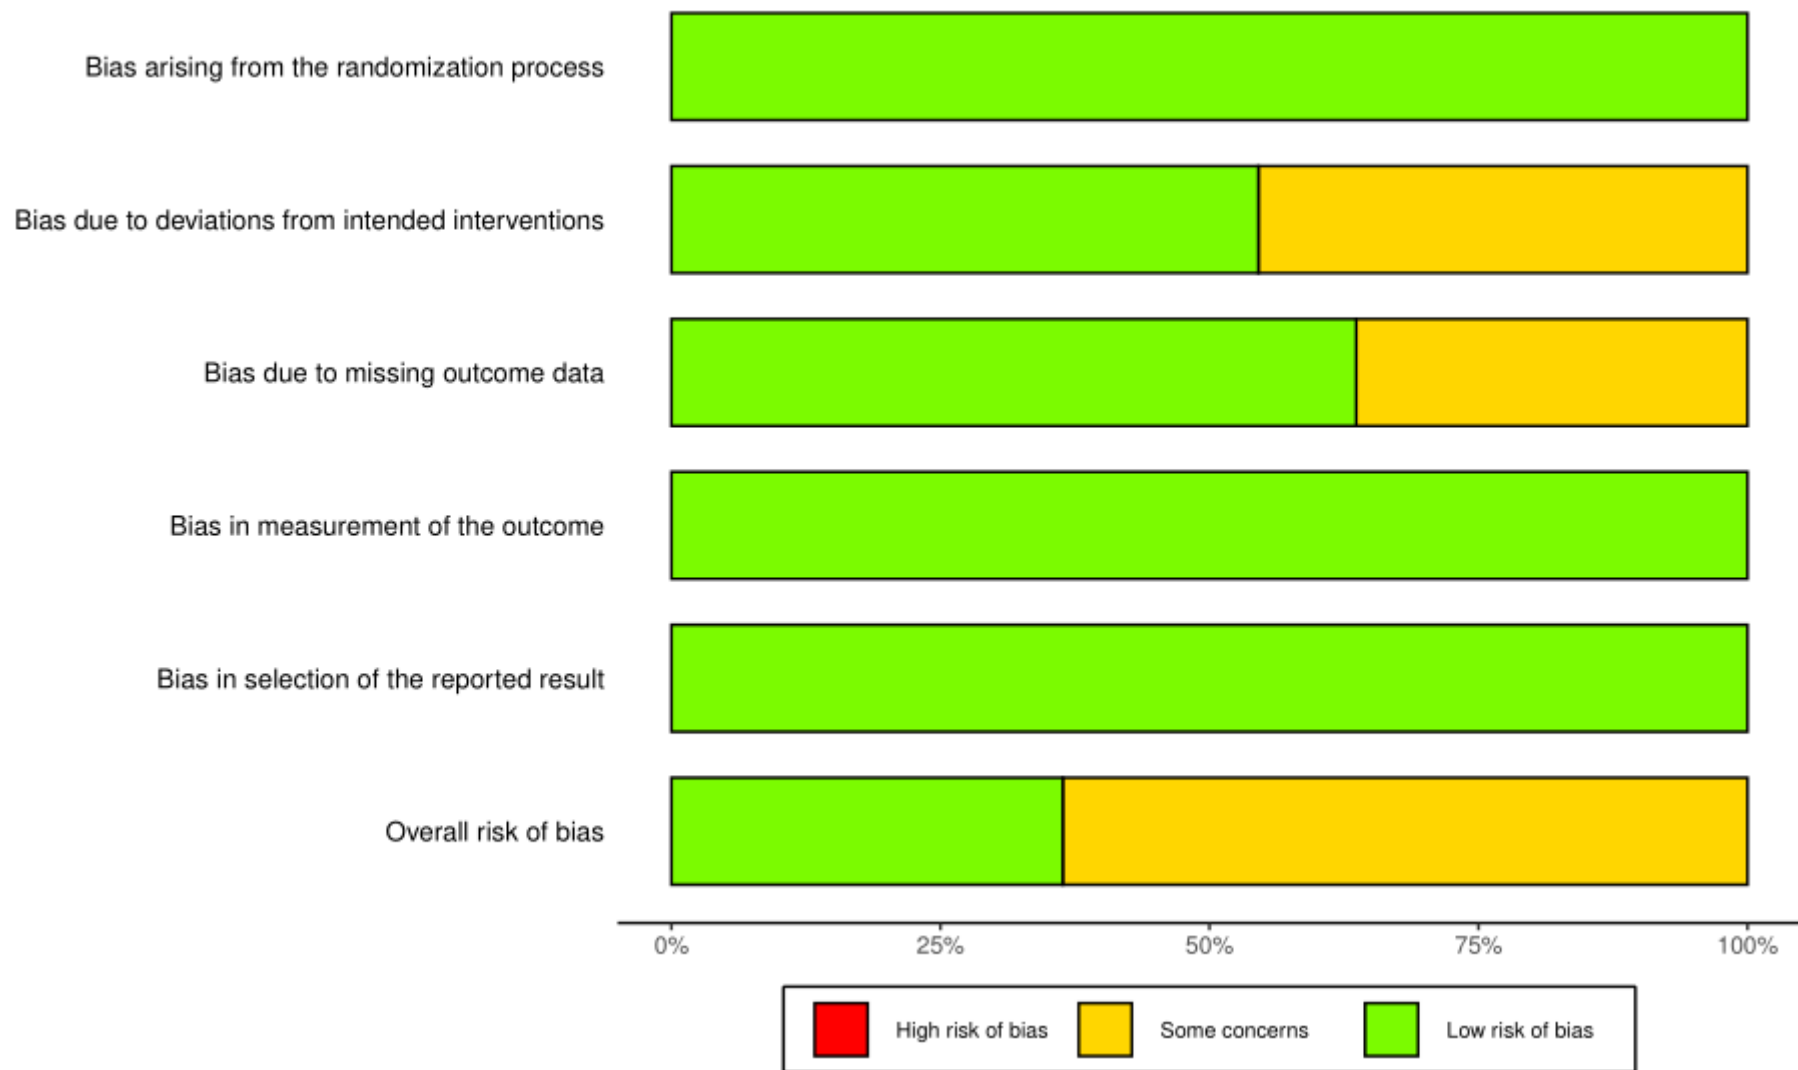

## **Risk of bias assessment for inclusion in randomized controlled trials**

|       |        | Risk of bias domains |    |    |    |    |    |    |         |
|-------|--------|----------------------|----|----|----|----|----|----|---------|
|       |        | D1                   | D2 | D3 | D4 | D5 | D6 | D7 | Overall |
| Study | 1(1)   | +                    | +  | +  | -  | -  | +  | +  | -       |
|       | 3(3)   | +                    | -  | +  | -  | +  | +  | +  | -       |
|       | 4(4)   | +                    | +  | +  | -  | +  | +  | +  | -       |
|       | 6(6)   | +                    | +  | +  | +  | +  | +  | +  | +       |
|       | 8(8)   | +                    | -  | +  | -  | -  | +  | +  | -       |
|       | 9(9)   | +                    | -  | +  | -  | -  | +  | +  | -       |
|       | 11(11) | +                    | +  | +  | -  | -  | +  | +  | -       |
|       | 12(12) | +                    | +  | +  | -  | -  | +  | +  | -       |
|       | 13(13) | +                    | -  | +  | -  | -  | +  | +  | -       |
|       | 14(14) | +                    | -  | +  | -  | -  | +  | +  | -       |
|       | 15(15) | +                    | -  | +  | -  | -  | +  | +  | -       |
|       | 17(17) | +                    | +  | +  | +  | +  | +  | +  | +       |
|       | 18(18) | +                    | -  | +  | +  | +  | +  | +  | -       |
|       | 21(21) | +                    | +  | +  | +  | +  | +  | +  | +       |

Domains:  
D1: Bias due to confounding.  
D2: Bias due to selection of participants.  
D3: Bias in classification of interventions.  
D4: Bias due to deviations from intended interventions.  
D5: Bias due to missing data.  
D6: Bias in measurement of outcomes.  
D7: Bias in selection of the reported result.

Judgement  
 Critical  
 Serious  
 Moderate  
 Low

## Risk of bias assessment for inclusion in non-randomized controlled trials

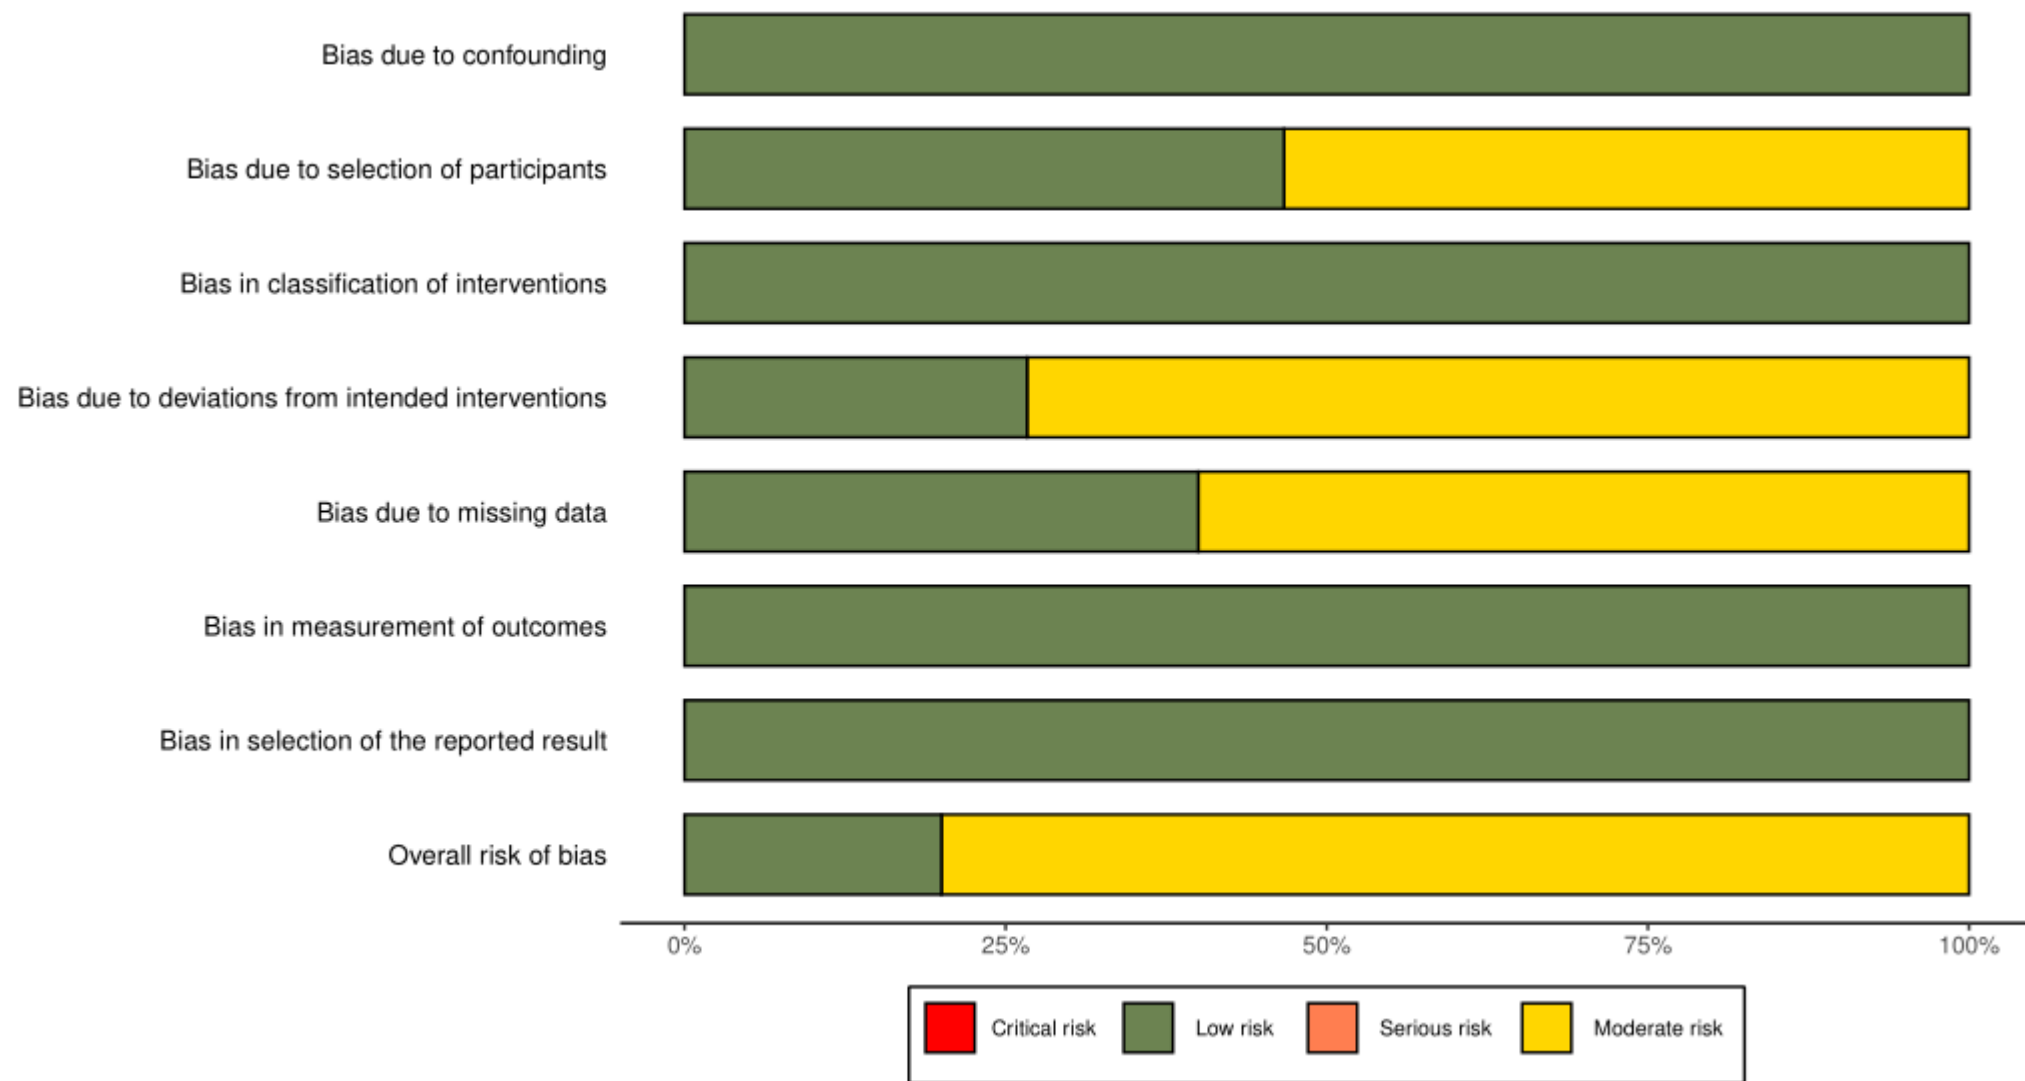

## Risk of bias assessment for inclusion in non-randomized controlled trials
