# Supplementary material for: Revealing the Central Mechanism of Acupuncture for Primary Dysmenorrhea Based on Neuroimaging: A Narrative Review
Source: Pain Res Manag. 2023 Feb 18;2023:8307249. doi: 10.1155/2023/8307249 (PMC9966569; doi:10.1155/2023/8307249)
Supplement: Supplementary Materials — Supplementary Figure 1. The literature search and screening process. Supplementary Figure 2. Risk of bias assessment included in the study. Supplementary Table 1. Search strategy. Supplementary Table 2. The basic information of included studies. Supplementary Table 3. The study design. Supplementary Table 4. The neuroimaging information. Supplementary Table 5. The study details. Figure 1. The basic information of included studies. Figure 2. The most commonly encountered brain regions. [file 8307249.f1.zip]

Archive with 7 entries (7 files):
- Revised_Supplementary_Figure_1 (1).pdf
- Revised_Supplementary_Figure_2 (1).pdf
- Revised_Supplementary_Table_1_search_strategy (1).docx
- Revised_Supplementary_Table_2_basic_information_reference.docx
- Revised_Supplementary_Table_3_study_design_reference.docx
- Revised_Supplementary_Table_4_scanning_information_reference (1).docx
- Revised_Supplementary_Table_5_Study_Details.docx
