# Supplementary figures and images for: Revealing the Central Mechanism of Acupuncture for Primary Dysmenorrhea Based on Neuroimaging: A Narrative Review
Source: Hindawi journal article supplement (doi:10.1155/2023/8307249), 2023-02-18

## Supplementary Figure1.

The flow diagram of literature search and screening process

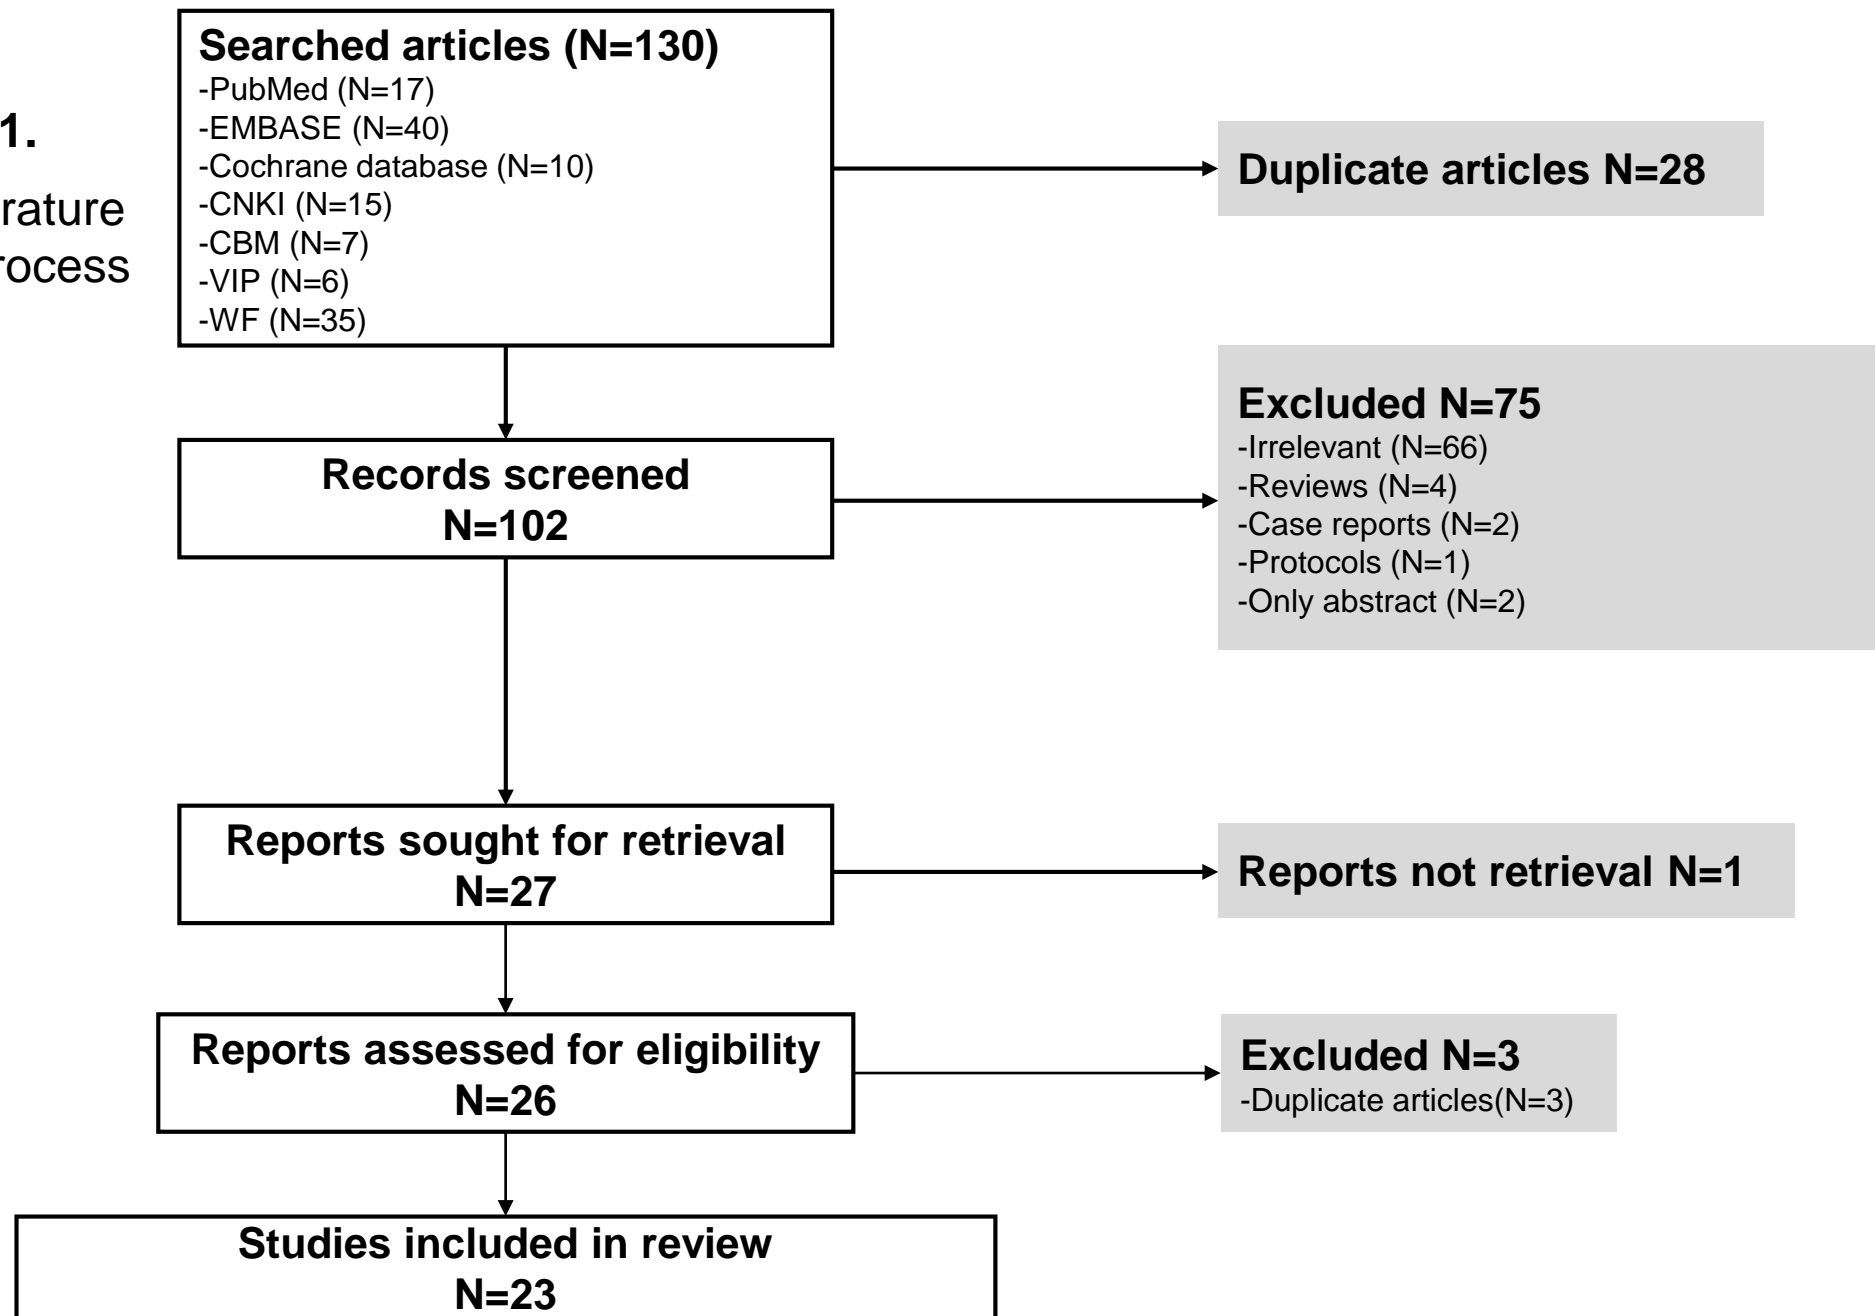

Supplement: f1 [file 8307249.f1.zip]
